# Supplementary material for: Seismic vulnerability of the Himalayan half-dressed rubble stone masonry structures, experimental and analytical studies
Source: Copernicus journal article supplement (doi:10.5194/nhess-12-3441-2012), 2012-11-21
Supplement: Supplementary file 1 [file nhess-12-3441-2012-supplement.zip]

Archive with 3 entries (3 files):
- Supp. Material-1 - Earthquake Spectra Paper, Review Purpose Only.pdf
- Supp. Material-2 - Article Number-[34], Review Purpose Only.pdf
- Supp. Material-3- In-Plane Cyclic Tests on Wall, Review Purpose Only.pdf
